# Supplementary material
Source: Springer Nature journal article supplement (https://www.springermedizin.de/resource/supplementary/12943_2012_1060_MOESM11_ESM.pdf/9552198)

## MCT1

A

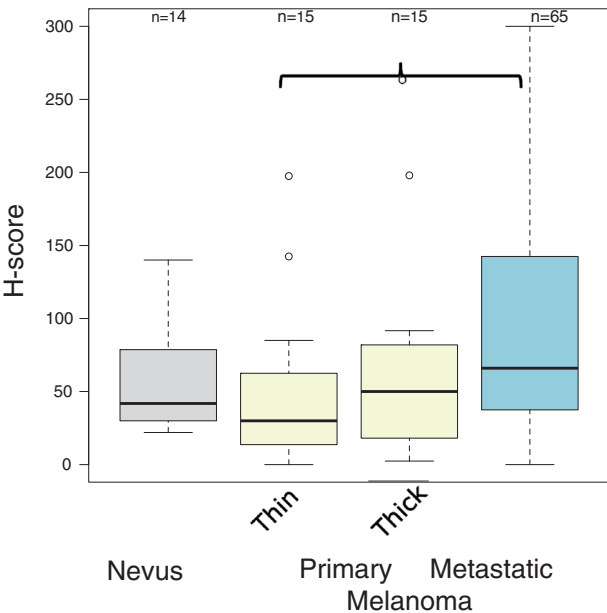

## MCT4

B

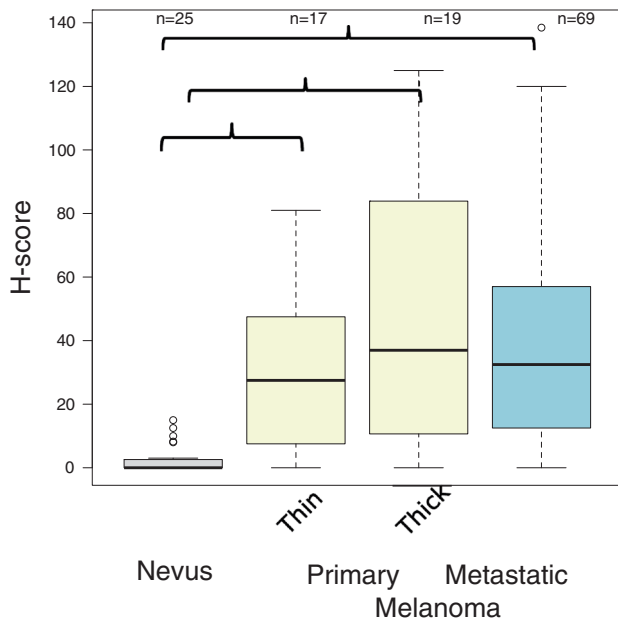

Supplement: MOESM11 [file 9552198]
